# Supplementary material for: Enhanced thermostability of Streptomyces mobaraensis transglutaminase via computation-aided site-directed mutations and structural analysis
Source: Royal Society of Chemistry journal article supplement (doi:10.1039/d3nj04708c), 2023-11-14
Supplement: d3nj04708c1.pdf [file d3nj04708c1.pdf]

## Supplementary Information

### **Enhanced Thermostability of *Streptomyces mobaraensis* Transglutaminase via Computation-aided Site-directed Mutations and Structural Analysis**

Yongzhen Li<sup>1</sup>, Banghao Wu<sup>1</sup>, Yumeng Zhang<sup>1</sup>,  
Lanxuan Liu<sup>2</sup>, Linqun Bai<sup>1</sup>, Ting Shi<sup>1,\*</sup>

<sup>1</sup>State Key Laboratory of Microbial Metabolism, Joint International Research Laboratory of Metabolic and Developmental Sciences, School of Life Sciences and Biotechnology, Shanghai Jiao Tong University, Shanghai 200240, China

<sup>2</sup>Digital Innovation of AI, WuXi Biologics, Shanghai 201400, China

**\*Corresponding author:**

Ting Shi, Email: [tshi@sjtu.edu.cn](mailto:tshi@sjtu.edu.cn).

|      |                          |                         |                          |                          |              |
|------|--------------------------|-------------------------|--------------------------|--------------------------|--------------|
| 1    | ATGGGCAGCAGC             | CATCATCATCAT<br>H H H H | CATCAC<br>H H            | AGCAGC                   | GGCCTGGTGCCG |
| 49   | CGCGGCAGCCAT             | ATGGACTCCGAC            | GAGCGGGTGACT             | <u>CCTCCCGCCGAG</u>      |              |
| 97   | <u>CCGCTCGACCGG</u>      | <u>ATGCCCGACCCG</u>     | <u>TACCGGCCCTCG</u>      | <u>TACGGCAGGGCC</u>      |              |
| 145  | <u>GAGACGATCGTC</u>      | <u>AACAACCTACATA</u>    | <u>CGCAAGTGGCAG</u>      | <u>CAGGTCTACAGC</u>      |              |
| 193  | <u>CACCGCGACGGC</u><br>H | <u>AGGAAACAGCAG</u>     | <u>ATGACCGAGGAA</u><br>E | <u>CAGCGGGAGTGG</u>      |              |
| 241  | <u>CTGTCTACGGT</u>       | <u>TGCGTCGGTGTC</u>     | <u>ACCTGGGTCAAC</u>      | <u>TCGGGCCAGTAT</u><br>Q |              |
| 289  | <u>CCGACGAACAGG</u>      | <u>CTGGCTTTCGCG</u>     | <u>TTCTTCGACGAG</u><br>E | <u>GACAAGTACAAG</u>      |              |
| 337  | <u>AACGAGCTGAAG</u>      | <u>AACGGCAGGCC</u>      | <u>CGGTCCGGCGAA</u>      | <u>ACGCGGGCGGAG</u>      |              |
| 385  | <u>TTCGAGGGGCGC</u>      | <u>GTCGCCAAGGAC</u>     | <u>AGCTTCGACGAG</u>      | <u>GCGAAGGGGTTC</u>      |              |
| 433  | <u>CAGCGGGCGCGT</u>      | <u>GACGTGGCGTCC</u>     | <u>GTCATGAACAAG</u>      | <u>GCCCTGGAGAAC</u>      |              |
| 481  | <u>GCCCACGACGAG</u>      | <u>GGGGCGTACCTC</u>     | <u>GACAACCTCAAG</u>      | <u>AAGGAGCTGGCG</u>      |              |
| 529  | <u>AACGGCAACGAC</u>      | <u>GCCCTGCGGAAC</u>     | <u>GAGGATGCCCGC</u>      | <u>TCGCCCTTCTAC</u>      |              |
| 577  | <u>TCGGCGCTGCGG</u>      | <u>AACACGCCGTCC</u>     | <u>TTCAAGGACCGC</u>      | <u>AACGGCGGCAAT</u>      |              |
| 625  | <u>CACGACCCGTCC</u>      | <u>AAGATGAAGGCC</u>     | <u>GTCATCTACTCG</u>      | <u>AAGCACTTCTGG</u>      |              |
| 673  | <u>AGCGGCCAGGAC</u>      | <u>CGGTCGGGCTCC</u>     | <u>AAGTACGGCGAC</u>      | <u>CCGGAGGCCTTC</u>      |              |
| 721  | <u>CGCCCCGACCGC</u>      | <u>GGCACCGGCCTG</u>     | <u>GTCGACATGTCG</u>      | <u>AGGGACAGGAAC</u>      |              |
| 769  | <u>ATTCGCGCAGC</u>       | <u>CCCACCAGCCCC</u>     | <u>GGCGAGAGTTTC</u>      | <u>GTCAATTTTCGAC</u>     |              |
| 817  | <u>TACGGCTGGTTC</u>      | <u>GGAGCGCAGACG</u>     | <u>GAAGCGGACGCC</u>      | <u>GACAAGACCGTA</u>      |              |
| 865  | <u>TGGACCCACGGC</u>      | <u>AACCACTACCAC</u>     | <u>GCGCCAATGGC</u>       | <u>AGCCTGGGTGCC</u>      |              |
| 913  | <u>ATGCACGTGTAC</u>      | <u>GAGAGCAAGTTC</u>     | <u>CGCAACTGGTCC</u>      | <u>GACGGTTACTCG</u>      |              |
| 961  | <u>GACTTCGACCGC</u>      | <u>GGAGCCTACGTG</u>     | <u>GTCACGTTCGTC</u>      | <u>CCCAAGAGCTGG</u>      |              |
| 1009 | <u>AACACCGCCCC</u>       | <u>GACAAGGTGACA</u>     | <u>CAGGGCTGGCCG</u>      | <u>TGA</u>               | *            |

**Fig. S1** The sequence analysis of smTG. Numbers (left side): the number of nucleotide sequences; Single underline: the region of mature smTG; Gray background: the mutation sites of the wild-type smTG; Box: His-tag.

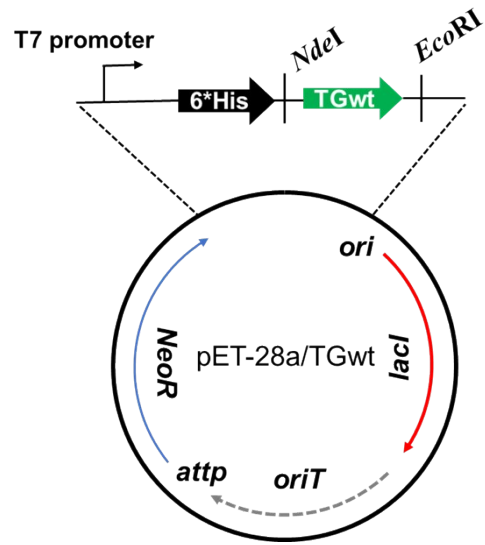

**Fig. S2** Schematic diagram of plasmid pET28a/TGwt.

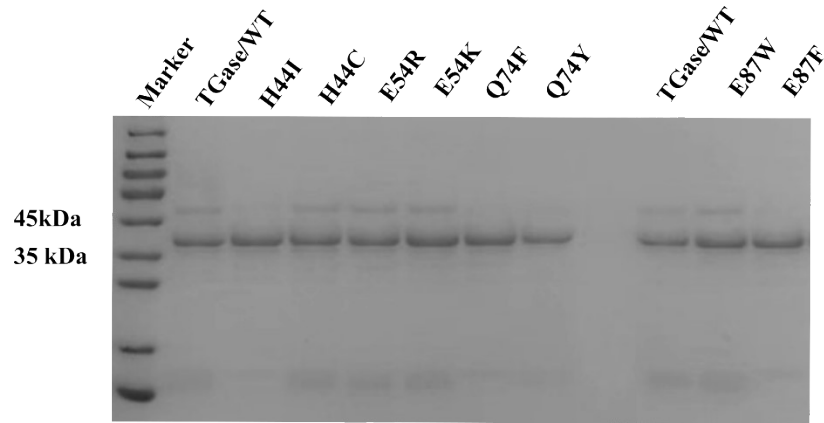

**Fig. S3** SDS-PAGE analysis of the TGm1 and its variants purified by affinity chromatography. The Mu-TGase and mutants were intracellularly expressed in *E. coli* BL21 (DE3) pGro7 using pET-28a/TGwt and its derivatives.

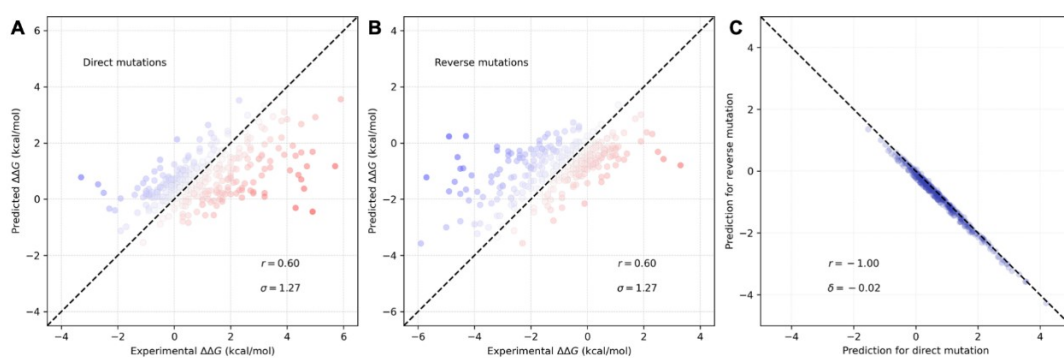

**Fig. S4** Model performance on  $S^{\text{sym}}$  dataset. (A) Model performance on predicting  $\Delta\Delta G$  for direct mutations; (B) Model performance on predicting  $\Delta\Delta G$  for reverse mutations; (C) Direct versus reverse  $\Delta\Delta G$  values of all the mutations in the test set. The color of points in A and B represents the difference between experimental and predicted  $\Delta\Delta G$  (Red:  $\Delta\Delta G_{\text{exp}} > \Delta\Delta G_{\text{pred}}$ , Blue:  $\Delta\Delta G_{\text{exp}} < \Delta\Delta G_{\text{pred}}$ ).

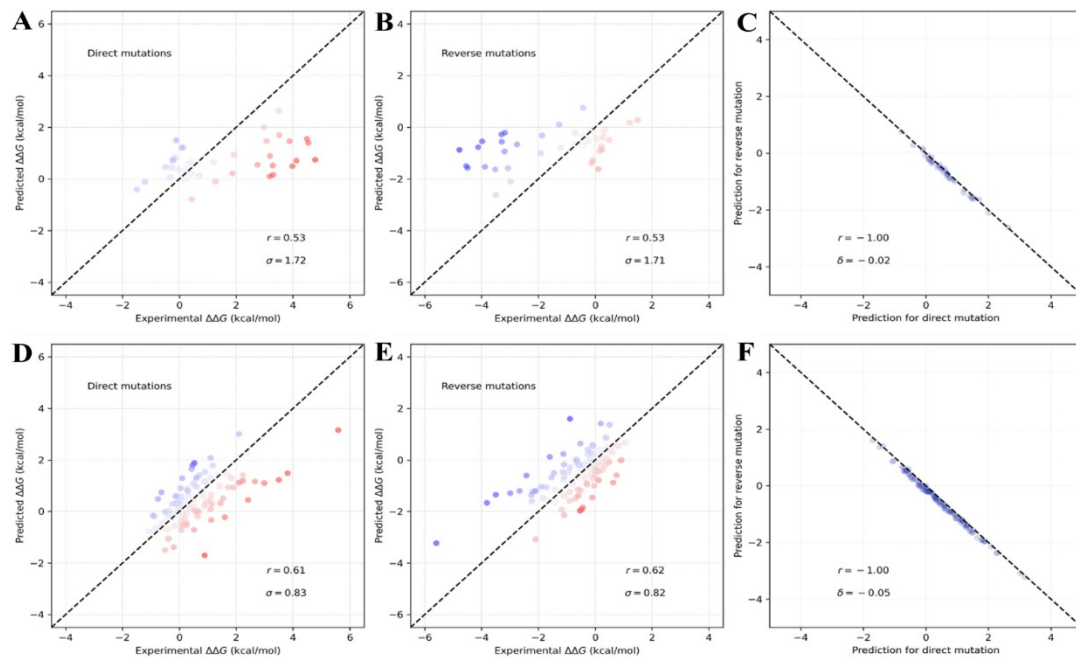

**Fig. S5** Model predicts the mutation effects on protein stability well in p53 protein and myoglobin. A, D. Model performance on predicting  $\Delta\Delta G$  for direct mutations; B, E. Model performance on predicting  $\Delta\Delta G$  for reverse mutations; C, F. Direct versus reverse  $\Delta\Delta G$  values of all the mutations in the test set.

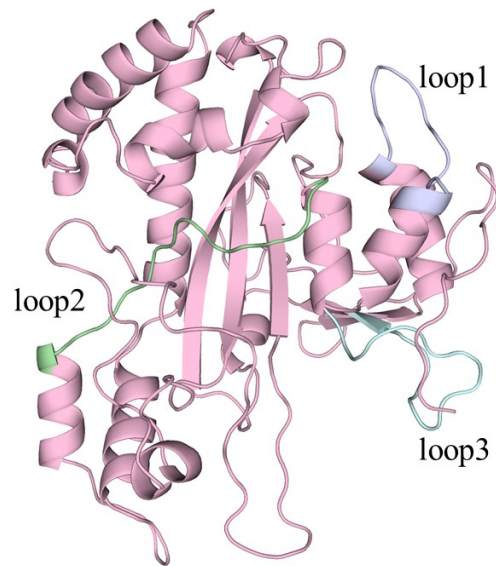

**Fig. S6** The crystal structure of smTG (PDB ID: 6gmg). The residue regions used for prediction are shown in different colors. Loop1 contains residues 42-54 in purple, loop2 contains residues 72-87 in green, and loop3 contains residues 274-289 in cyan.

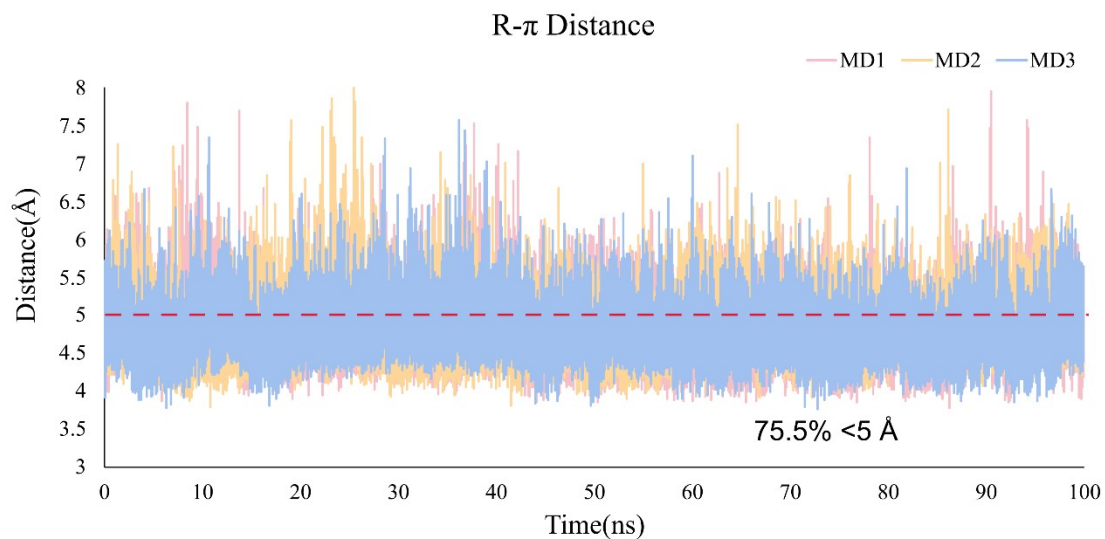

**Fig. S7** Statistics of the ring-to-ring distance between F74 and P177. More than 75% of the time in 100 ns is within 5 Å distance.



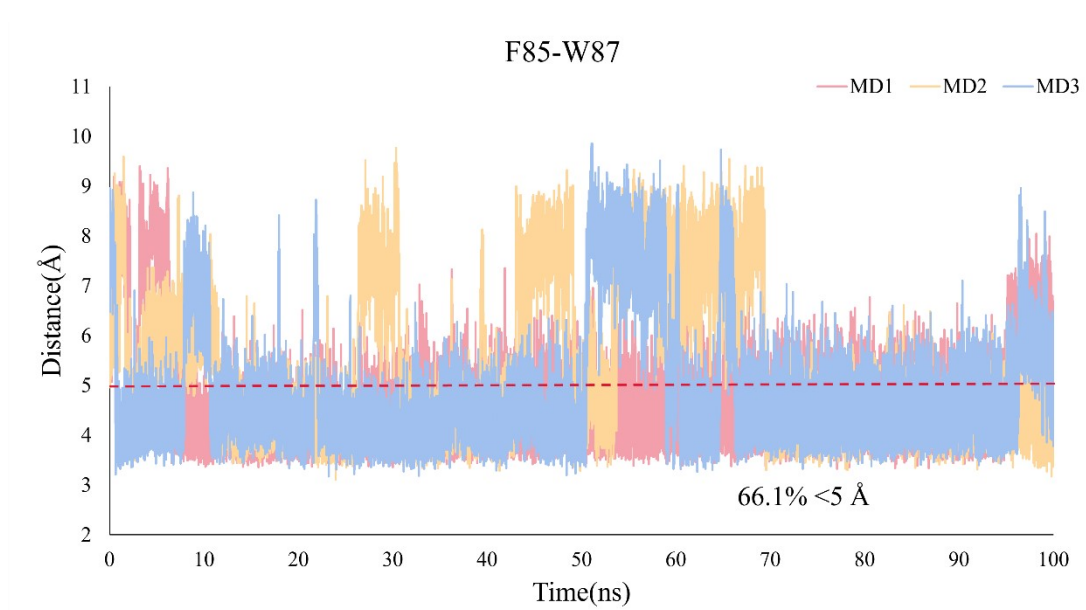

**Fig. S8** Statistical results of side-chain distances for F85 and W87. More than 66.1% of the time in 100 ns is within 5 Å distance.

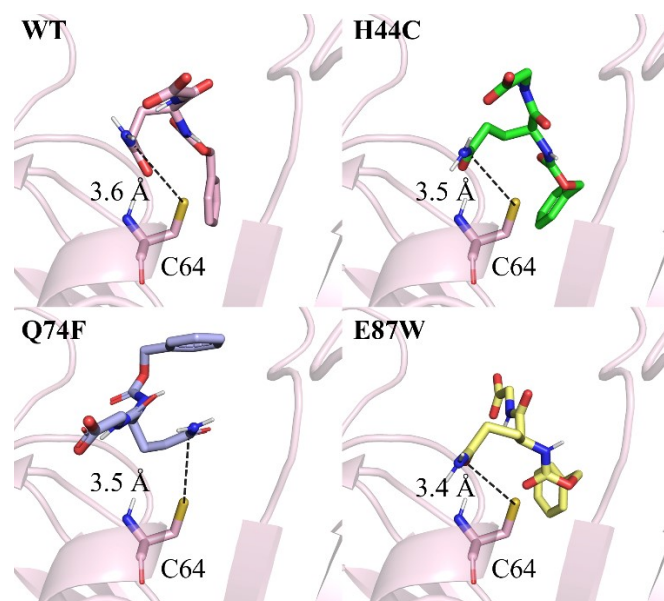

**Fig. S9** Docking poses of CBZ-Gln-Gly in different systems.

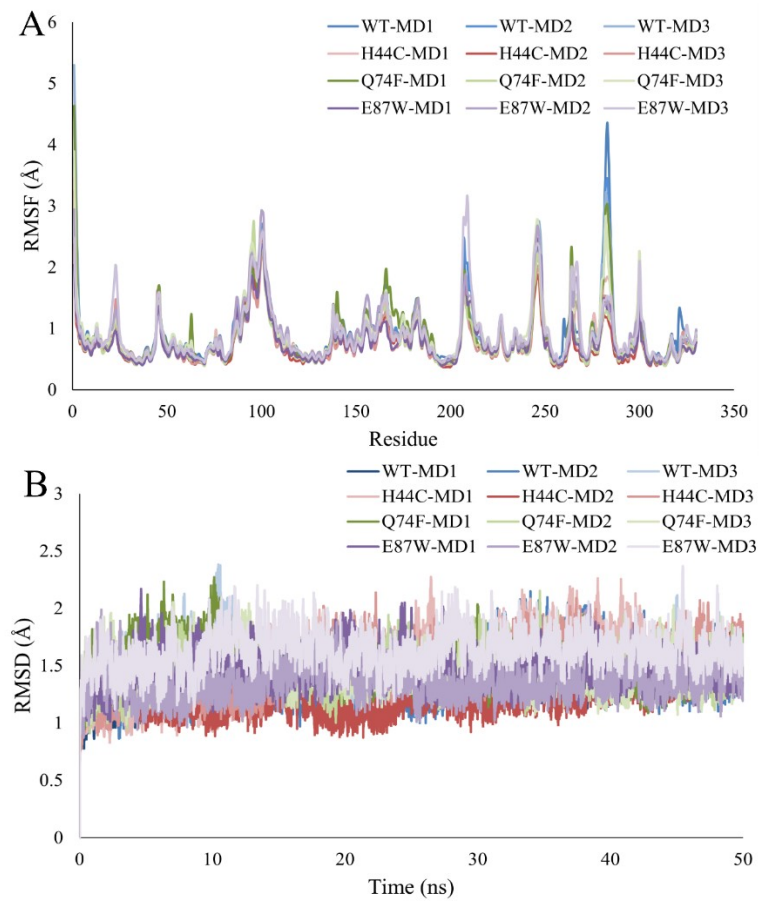

**Fig. S10** RMSF and RMSD of wild-type and mutant smTG with substrate.

**Table. S1** Primers used in this study.

| Primers     | Sequences (5'-3')                                        | Mutations  |
|-------------|----------------------------------------------------------|------------|
| MTGase-F    | CCGGAATTCTCACGGCCAGCCCTGTGTCAC                           |            |
| MTGase-R    | CGCCATATGGACTCCGACGAGCGGGTGAC                            |            |
| Mutation1-F | GCAGGAAACAGCAGATGACCA <u>AAGGAACAG</u><br>CGGGAGTGGCTGTC | E54K       |
| Mutation2-F | GCAGGAAACAGCAGATGACCC <u>CGCGAACAG</u><br>CGGGAGTGGCTGTC | E54R       |
| Mutation1-R | GGTCATCTGCTGTTTCTCGCCGTCGCGGTG<br>GCTGTAGACC             | E54K, E54R |
| Mutation3-F | TCACCTGGGTCAACTCGGGCT <u>ACTATCCG</u><br>ACGAACAGGCTGGC  | Q74Y       |
| Mutation4-F | TCACCTGGGTCAACTCGGGCT <u>TTCTATCCG</u><br>ACGAACAGGCTGGC | Q74F       |
| Mutation2-R | GCCCGAGTTGACCCAGGTGACACCGACG<br>CAACCGTAGGAC             | Q74Y, Q74F |
| Mutation5-F | AGTGGCAGCAGGTCTACAGCT <u>GCCGCGA</u><br>CGGCAGGAAACAGCA  | H44C       |
| Mutation6-F | AGTGGCAGCAGGTCTACAGC <u>ATACGCGA</u><br>CGGCAGGAAACAGCA  | H44I       |
| Mutation3-R | GCTGTAGACCTGCTGCCACTTGCATATGT<br>AGTTGTTGACG             | H44C, H44I |
| Mutation7-F | TGGCTTTCGCGTTCTTCGACT <u>TGGGACAAG</u><br>TACAAGAACGAGCT | E87W       |
| Mutation8-F | TGGCTTTCGCGTTCTTCGACT <u>TCGACAAG</u><br>TACAAGAACGAGCT  | E87F       |
| Mutation4-R | GTCGAAGAACGCGAAAGCCAGCCTGTTC<br>GTCGGATACTGG             | E87F, E87W |

The mutation sites were underlined.

**Table. S2** The ablation study on the selection of the GNN operator, radius of mutation neighborhood, and node features.

| <b>GNN Operator</b>            | $\sigma_{dir}$ | $r_{dir}$   | $\sigma_{rev}$ | $r_{rev}$   |
|--------------------------------|----------------|-------------|----------------|-------------|
| GCN                            | 0.53           | 0.54        | 1.40           | 1.40        |
| GIN                            | 0.58           | 0.57        | 1.37           | 1.37        |
| <b>GAT</b>                     | <b>0.60</b>    | <b>0.60</b> | <b>1.27</b>    | <b>1.27</b> |
| <b>Neighborhood radius (Å)</b> | $\sigma_{dir}$ | $r_{dir}$   | $\sigma_{rev}$ | $r_{rev}$   |
| 10                             | 0.59           | 0.59        | 1.30           | 1.30        |
| <b>12</b>                      | <b>0.60</b>    | <b>0.60</b> | <b>1.27</b>    | <b>1.27</b> |
| 14                             | 0.55           | 0.54        | 1.33           | 1.33        |
| 16                             | 0.52           | 0.53        | 1.38           | 1.37        |
| <b>Feature encoding</b>        | $\sigma_{dir}$ | $r_{dir}$   | $\sigma_{rev}$ | $r_{rev}$   |
| w/o Evolutionary               | 0.55           | 0.56        | 1.34           | 1.33        |
| w/o Energy                     | 0.36           | 0.35        | 1.64           | 1.65        |
| w/o Amino acid                 | 0.54           | 0.54        | 1.34           | 1.34        |
| <b>All</b>                     | <b>0.60</b>    | <b>0.60</b> | <b>1.27</b>    | <b>1.27</b> |

**Table. S3** Performance comparison on balanced test set  $S^{\text{sym}}$ .

| Method        | $\sigma_{dir}$ | $r_{dir}$   | $\sigma_{rev}$ | $r_{rev}$   | $r_{dir-rev}$ | $\langle\delta\rangle$ |
|---------------|----------------|-------------|----------------|-------------|---------------|------------------------|
| FoldX         | 1.56           | 0.63        | 2.13           | 0.39        | -0.38         | -0.47                  |
| Rosetta       | 2.31           | 0.69        | 2.61           | 0.43        | -0.41         | -0.69                  |
| CUPSAT        | 1.71           | 0.39        | 2.88           | 0.05        | -0.54         | -0.72                  |
| PoPMuSiC v2.1 | 1.21           | 0.63        | 2.18           | 0.25        | -0.29         | -0.71                  |
| STRUM         | 1.05           | 0.75        | 2.51           | -0.15       | 0.34          | -0.87                  |
| MAESTRO       | 1.36           | 0.52        | 2.09           | 0.32        | -0.34         | -0.58                  |
| mCSM          | 1.23           | 0.61        | 2.43           | 0.14        | -0.26         | -0.91                  |
| MUPRO         | 0.94           | 0.79        | 2.51           | 0.07        | -0.02         | -0.97                  |
| INPS          | 0.51           | 0.50        | 1.42           | 1.44        | -0.99         | -0.04                  |
| I-Mutant 3.0  | 1.23           | 0.62        | 2.32           | -0.04       | 0.02          | -0.68                  |
| DDGun3D       | 1.42           | 0.56        | 1.46           | 0.53        | -0.99         | -0.02                  |
| iSTABLE       | 1.10           | 0.72        | 2.28           | -0.08       | 0.02          | -0.68                  |
| DUET          | 1.20           | 0.63        | 2.38           | 0.13        | -0.21         | -0.84                  |
| NeEMO         | 1.08           | 0.72        | 2.35           | 0.02        | 0.09          | -0.60                  |
| ThermoNet     | 1.56           | 0.47        | 1.55           | 0.47        | -0.96         | -0.01                  |
| ACDC-NN       | 1.45           | 0.57        | 1.45           | 0.57        | -1.00         | -0.00                  |
| <b>Ours</b>   | <b>1.27</b>    | <b>0.60</b> | <b>1.27</b>    | <b>0.60</b> | <b>-1.00</b>  | <b>-0.02</b>           |

$\sigma_{dir}$  and  $r_{dir}$  are the root mean square error and the Pearson correlation coefficient between the predicted and experimental  $\Delta\Delta G$  values for the direct mutations.  $\sigma_{rev}$  and  $r_{rev}$  are the root mean square error and the Pearson correlation coefficient for the reverse mutations. The antisymmetry between direct and reverse mutations is assessed using the correlation coefficient  $r_{dir-rev}$  and the average bias  $\langle\delta\rangle$ . A perfectly unbiased predictor should have  $r_{dir-rev} = -1$  and  $\langle\delta\rangle = 0$  kcal/mol.

**Table. S4** Prediction results on p53 protein.

| Method    | $\sigma_{dir}$ | $r_{dir}$ | $\sigma_{rev}$ | $r_{rev}$ | $r_{dir-rev}$ | $\langle\delta\rangle$ |
|-----------|----------------|-----------|----------------|-----------|---------------|------------------------|
| ThermoNet | 2.01           | 0.45      | 1.92           | 0.56      | -0.93         | -0.04                  |
| ACDC-NN   | 1.69           | 0.61      | 1.69           | 0.61      | -1.00         | -0.00                  |
| Ours      | 1.72           | 0.53      | 1.71           | 0.53      | -1.00         | -0.02                  |

The TP53 tumor suppressor gene encodes the p53 transcription factor that is mutated in about 45% of all human cancers. Single amino acid substitutions in p53 often affect DNA binding or disrupt the conformation and stability of p53 protein.<sup>1</sup> The TP53 tumor suppressor gene encodes the p53 transcription factor that is mutated in about 45% of all human cancers. Single amino acid substitutions in p53 often affect DNA binding or disrupt the conformation and stability of p53 protein. With the same data-processing pipeline, the model capacity of estimating the thermodynamic effects derived from mutations in p53. The results were compared with ThermoNet and ACDC-NN.

**Table. S5** Prediction results on myoglobin.

| Method    | $\sigma_{dir}$ | $r_{dir}$ | $\sigma_{rev}$ | $r_{rev}$ | $r_{dir-rev}$ | $\langle\delta\rangle$ |
|-----------|----------------|-----------|----------------|-----------|---------------|------------------------|
| ThermoNet | 1.16           | 0.38      | 1.18           | 0.37      | -0.97         | -0.02                  |
| ACDC-NN   | 0.89           | 0.58      | 0.89           | 0.58      | -1.00         | -0.00                  |
| Ours      | 0.83           | 0.61      | 0.82           | 0.62      | -1.00         | -0.05                  |

Myoglobin regulates cellular oxygen concentration in cardiac myocytes and oxidative skeletal muscle fibers by reversible binding of oxygen.<sup>2</sup> The myoglobin dataset includes 134 mutations throughout the chain (PDB ID: 1BZ6). With the same data-processing pipeline, the model capacity of estimating the thermodynamic effects derived from mutations in myoglobin protein was examined. The results were compared with ThermoNet and ACDC-NN.



**Table. S6** The prediction of mutations with  $\Delta\Delta G$  value below -0.5 kcal/mol.

| PDB   | Position | WT | MUT | $\Delta\Delta G$<br>(kcal/mol) | PDB   | Position | WT | MUT | $\Delta\Delta G$<br>(kcal/mol) |
|-------|----------|----|-----|--------------------------------|-------|----------|----|-----|--------------------------------|
| 1iu4A | 43       | S  | F   | -0.87                          | 1iu4A | 74       | Q  | I   | -0.92                          |
| 1iu4A | 44       | H  | V   | -0.95                          | 1iu4A | 74       | Q  | C   | -0.84                          |
| 1iu4A | 44       | H  | C   | -0.75                          | 1iu4A | 74       | Q  | L   | -0.8                           |
| 1iu4A | 44       | H  | I   | -0.73                          | 1iu4A | 74       | Q  | M   | -0.63                          |
| 1iu4A | 44       | H  | F   | -0.72                          | 1iu4A | 74       | Q  | T   | -0.61                          |
| 1iu4A | 44       | H  | Y   | -0.72                          | 1iu4A | 74       | Q  | V   | -0.59                          |
| 1iu4A | 44       | H  | W   | -0.66                          | 1iu4A | 76       | P  | Y   | -1.23                          |
| 1iu4A | 44       | H  | T   | -0.65                          | 1iu4A | 78       | N  | M   | -1.19                          |
| 1iu4A | 44       | H  | P   | -0.5                           | 1iu4A | 78       | N  | C   | -0.76                          |
| 1iu4A | 48       | R  | P   | -0.98                          | 1iu4A | 79       | R  | I   | -0.86                          |
| 1iu4A | 49       | K  | Y   | -0.57                          | 1iu4A | 79       | R  | T   | -0.81                          |
| 1iu4A | 49       | K  | F   | -0.51                          | 1iu4A | 79       | R  | V   | -0.73                          |
| 1iu4A | 49       | K  | P   | -0.51                          | 1iu4A | 83       | A  | W   | -0.66                          |
| 1iu4A | 54       | E  | K   | -0.87                          | 1iu4A | 84       | S  | C   | -0.9                           |
| 1iu4A | 54       | E  | L   | -0.81                          | 1iu4A | 84       | S  | F   | -0.88                          |
| 1iu4A | 54       | E  | R   | -0.62                          | 1iu4A | 84       | S  | Y   | -0.81                          |
| 1iu4A | 54       | E  | I   | -0.6                           | 1iu4A | 84       | S  | W   | -0.55                          |
| 1iu4A | 54       | E  | C   | -0.59                          | 1iu4A | 84       | S  | I   | -0.54                          |
| 1iu4A | 54       | E  | P   | -0.58                          | 1iu4A | 85       | F  | W   | -0.65                          |
| 1iu4A | 54       | E  | T   | -0.58                          | 1iu4A | 86       | D  | L   | -0.75                          |
| 1iu4A | 54       | E  | F   | -0.56                          | 1iu4A | 86       | D  | I   | -0.57                          |
| 1iu4A | 54       | E  | Y   | -0.55                          | 1iu4A | 87       | E  | Y   | -2.03                          |
| 1iu4A | 72       | S  | L   | -0.71                          | 1iu4A | 87       | E  | F   | -1.79                          |
| 1iu4A | 73       | G  | M   | -0.69                          | 1iu4A | 87       | E  | W   | -1.18                          |
| 1iu4A | 73       | G  | C   | -0.65                          | 1iu4A | 87       | E  | L   | -0.91                          |
| 1iu4A | 74       | Q  | Y   | -1.25                          | 1iu4A | 87       | E  | H   | -0.75                          |
| 1iu4A | 74       | Q  | F   | -1.13                          | 1iu4A | 87       | E  | C   | -0.7                           |
| 1iu4A | 74       | Q  | P   | -1.1                           | 1iu4A | 87       | E  | V   | -0.52                          |

**Table. S7** Residual enzyme activities of wide-type and mutant smTG with different incubation time at 60 °C.

| Incubation time at 60 °C | 0 min | 10 min | 20 min | 30 min |
|--------------------------|-------|--------|--------|--------|
| TGase (U/mg)             | 27.68 | 1.34   | 0.40   | 0.17   |
| H44C (U/mg)              | 25.64 | 2.01   | 0.92   | 0.21   |
| H44I (U/mg)              | 32.81 | 2.17   | 0.41   | 0.26   |
| E54K (U/mg)              | 27.50 | 0.40   | 0.21   | 0.17   |
| E54R (U/mg)              | 31.97 | 1.16   | 0.25   | 0.11   |
| Q74Y (U/mg)              | 30.44 | 0.78   | 0.29   | 0.31   |
| Q74F (U/mg)              | 27.80 | 1.84   | 3.07   | 0.62   |
| E87W (U/mg)              | 21.93 | 1.08   | 2.33   | 0.45   |
| E87F (U/mg)              | 28.63 | 1.16   | 0.71   | 0.43   |

**Table. S8** Hydrogen bond interactions more than 80%.

| Sys       | Acceptor    | Donor    | Frac    | Sys         | Acceptor | Donor       | Frac   |
|-----------|-------------|----------|---------|-------------|----------|-------------|--------|
| <b>WT</b> | E58@O       | S61@OG   | 0.9741  | <b>Q74F</b> | E58@O    | S61@OG      | 0.9652 |
|           | S293@O      | W272@N   | 0.9411  |             | S293@O   | W272@N      | 0.9329 |
|           | A267@O      | T270@OG1 | 0.9000  |             | N78@OD1  | Y198@OH     | 0.9051 |
|           | Y198@O      | V311@N   | 0.8963  |             | Y34@O    | W38@N       | 0.8841 |
|           | N78@O       | Y198@OH  | 0.8810  |             | N33@OD1  | D18@N       | 0.8797 |
|           | Y34@O       | W38@N    | 0.8737  |             | V112@O   | S116@OG     | 0.8748 |
|           | V271@O      | Q262@NE2 | 0.8723  |             | Y198@O   | V311@N      | 0.8686 |
|           | N33@O       | D18@N    | 0.8678  |             | V271@O   | Q262@NE2    | 0.8674 |
|           | D306@O      | R307@NH1 | 0.8618  |             | D306@O   | R307@NH1    | 0.8593 |
|           | T29@O       | V290@N   | 0.8598  |             | D306@OD2 | S204@OG     | 0.8470 |
|           | Y310@O      | F82@N    | 0.8564  |             | D255@O   | HIP201@N    | 0.8387 |
|           | V112@O      | S116@OG  | 0.8487  |             | HID274@O | Y291@N      | 0.8386 |
|           | D306@O      | S204@N   | 0.8312  |             | T29@O    | V290@N      | 0.8357 |
|           | D306@O      | S204@OG  | 0.8306  |             | Y310@O   | F82@N       | 0.8355 |
|           | I315@O      | K194@N   | 0.8216  |             | R192@O   | K317@N      | 0.8264 |
|           | <b>H44C</b> | E58@O    | S61@OG  |             | 0.9830   | <b>E87W</b> | E58@O  |
| S293@O    |             | W272@N   | 0.9189  | S293@O      | W272@N   |             | 0.9337 |
| N78@OD1   |             | Y198@OH  | 0.9088  | N78@OD1     | Y198@OH  |             | 0.8932 |
| Y198@O    |             | V311@N   | 0.8856  | Y198@O      | V311@N   |             | 0.8875 |
| V271@O    |             | Q262@NE2 | 0.8852  | Y34@O       | W38@N    |             | 0.8740 |
| N33@OD1   |             | D18@N    | 0.8794  | N33@OD1     | D18@N    |             | 0.8721 |
| Y34@O     |             | W38@N    | 0.8753  | V271@O      | Q262@NE2 |             | 0.8634 |
| A267@O    |             | T270@OG1 | 0.8713  | D306@O      | R307@NH1 |             | 0.8621 |
| D306@O    |             | R307@NH1 | 0.8604  | Y310@O      | F82@N    |             | 0.8598 |
| V112@O    |             | S116@OG  | 0.8539  | V112@O      | S116@OG  |             | 0.8559 |
| Y310@O    |             | F82@N    | 0.8482  | D306@OD2    | S204@OG  |             | 0.8446 |
| T29@O     |             | V290@N   | 0.8349  | D306@OD1    | S204@N   |             | 0.8406 |
| D255@O    |             | HIP201@N | 0.8341  | HID274@O    | Y291@N   |             | 0.8398 |
| R192@O    |             | K317@N   | 0.8298  | T29@O       | V290@N   |             | 0.8349 |
| T68@O     |             | S72@OG   | 0.8248  | D255@O      | HIP201@N |             | 0.8267 |
| D306@OD2  |             | S204@OG  | 0.8234  | R192@O      | K317@N   |             | 0.8244 |
| D306@OD1  | S204@N      | 0.8230   | I315@O  | K194@N      | 0.8058   |             |        |
| Q39@OE1   | M52@N       | 0.8225   | Q39@OE1 | M52@N       | 0.8030   |             |        |
| I315@O    | K194@N      | 0.8112   |         |             |          |             |        |

**Table. S9** DSSP analysis of wild protein and Q74F about residue 177,178,179,180.

| Sys  | State | Res | Para | Anti | 3-10 Helix | Alpha         | Pi | Turn   | Bend   |
|------|-------|-----|------|------|------------|---------------|----|--------|--------|
| WT   | DSSP1 | 177 | 0    | 0    | 0.1752     | 0.5765        | 0  | 0.1935 | 0.0548 |
|      |       | 178 | 0    | 0    | 0.1988     | 0.5765        | 0  | 0.2206 | 0.0041 |
|      |       | 179 | 0    | 0    | 0.1988     | 0.5765        | 0  | 0.1888 | 0.0360 |
|      |       | 180 | 0    | 0    | 0.0917     | 0.5765        | 0  | 0.1929 | 0.1389 |
|      | DSSP2 | 177 | 0    | 0    | 0.1923     | 0.5692        | 0  | 0.1929 | 0.0456 |
|      |       | 178 | 0    | 0    | 0.2168     | 0.5692        | 0  | 0.2120 | 0.0020 |
|      |       | 179 | 0    | 0    | 0.2168     | 0.5692        | 0  | 0.1924 | 0.0216 |
|      |       | 180 | 0    | 0    | 0.1013     | 0.5692        | 0  | 0.1900 | 0.1394 |
|      | DSSP3 | 177 | 0    | 0    | 0.2189     | 0.5328        | 0  | 0.2054 | 0.0429 |
|      |       | 178 | 0    | 0    | 0.2407     | 0.5328        | 0  | 0.2240 | 0.0025 |
|      |       | 179 | 0    | 0    | 0.2407     | 0.5328        | 0  | 0.1903 | 0.0363 |
|      |       | 180 | 0    | 0    | 0.1166     | 0.5328        | 0  | 0.1970 | 0.1536 |
|      | AVE   | 177 | 0    | 0    | 0.1955     | <b>0.5595</b> | 0  | 0.1973 | 0.0478 |
|      |       | 178 | 0    | 0    | 0.2188     | <b>0.5595</b> | 0  | 0.2189 | 0.0029 |
|      |       | 179 | 0    | 0    | 0.2188     | <b>0.5595</b> | 0  | 0.1905 | 0.0313 |
|      |       | 180 | 0    | 0    | 0.1032     | <b>0.5595</b> | 0  | 0.1933 | 0.1440 |
| Q74F | DSSP1 | 177 | 0    | 0    | 0.1444     | 0.6749        | 0  | 0.1454 | 0.0353 |
|      |       | 178 | 0    | 0    | 0.1612     | 0.6749        | 0  | 0.1627 | 0.0011 |
|      |       | 179 | 0    | 0    | 0.1612     | 0.6749        | 0  | 0.1452 | 0.0186 |
|      |       | 180 | 0    | 0    | 0.0631     | 0.6749        | 0  | 0.1558 | 0.1061 |
|      | DSSP2 | 177 | 0    | 0    | 0.1513     | 0.6501        | 0  | 0.1505 | 0.0481 |
|      |       | 178 | 0    | 0    | 0.1755     | 0.6501        | 0  | 0.1728 | 0.0015 |
|      |       | 179 | 0    | 0    | 0.1755     | 0.6501        | 0  | 0.1640 | 0.0103 |
|      |       | 180 | 0    | 0    | 0.0773     | 0.6501        | 0  | 0.1741 | 0.0984 |
|      | DSSP3 | 177 | 0    | 0    | 0.1433     | 0.6546        | 0  | 0.1581 | 0.0440 |
|      |       | 178 | 0    | 0    | 0.1662     | 0.6546        | 0  | 0.1776 | 0.0017 |
|      |       | 179 | 0    | 0    | 0.1662     | 0.6546        | 0  | 0.1697 | 0.0096 |
|      |       | 180 | 0    | 0    | 0.0764     | 0.6546        | 0  | 0.1642 | 0.1048 |
|      | AVE   | 177 | 0    | 0    | 0.1463     | <b>0.6599</b> | 0  | 0.1513 | 0.0425 |
|      |       | 178 | 0    | 0    | 0.1676     | <b>0.6599</b> | 0  | 0.1710 | 0.0014 |
|      |       | 179 | 0    | 0    | 0.1676     | <b>0.6599</b> | 0  | 0.1596 | 0.0128 |
|      |       | 180 | 0    | 0    | 0.0723     | <b>0.6599</b> | 0  | 0.1647 | 0.1031 |

**Table. S10** MM-GBSA in smTG and its mutants.

| <b>System</b> | <b>MM-GBSA(kcal/mol)</b> |            |            | <b>Ave.<br/>(Sys)</b> | <b>Std.err.of<br/>mean</b> |
|---------------|--------------------------|------------|------------|-----------------------|----------------------------|
|               | <b>MD1</b>               | <b>MD2</b> | <b>MD3</b> |                       |                            |
| WT            | -21.30                   | -19.30     | -20.02     | -20.21                | 0.83                       |
| H44C          | -26.40                   | -26.90     | -26.50     | -26.60                | 0.22                       |
| Q74F          | -21.14                   | -21.69     | -20.96     | -21.26                | 0.31                       |
| E87W          | -17.50                   | -17.29     | -16.08     | -16.96                | 0.63                       |

## REFERENCES IN SUPPLEMENTARY INFORMATION

- (1) Olivier, M.; Eeles, R.; Hollstein, M.; Khan, M. A.; Harris, C. C.; Hainaut, P. The IARC TP53 Database: New Online Mutation Analysis and Recommendations to Users. *Hum. Mutat.* **2002**, *19* (6), 607–614.
- (2) Ordway, G. A.; Garry, D. J. Myoglobin: An Essential Hemoprotein in Striated Muscle. *J. Exp. Biol.* **2004**, *207* (20), 3441–3446.
